# Supplementary material for: A Multi-Specific DARPin Potently Neutralizes Shiga Toxin 2 via Simultaneous Modulation of Both Toxin Subunits
Source: MDPI journal article supplement (doi:10.3390/bioengineering9100511), 2022-09-27
Supplement: s1 [file s1]

## Supplementary Information

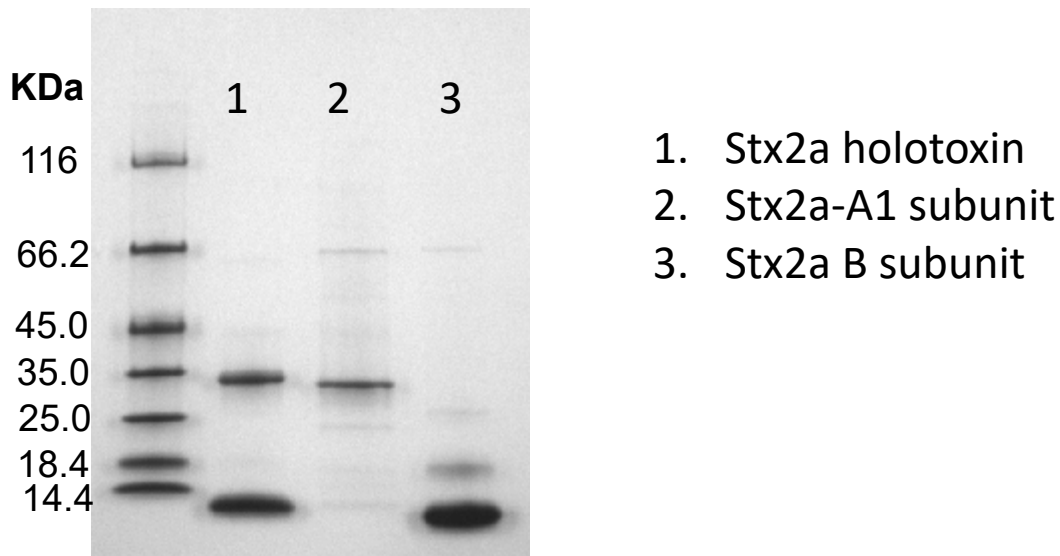

### Amino acid sequences:

#### Stx2a holotoxin:

MKCILFKWVLCLLLGFSVSYSREFTIDFSTQQSYVSSLNSIRTEISTPLEHISQGTTSVSVINHTPPGSYFAVDIRGLDVYQARFDHLR  
LIIEQNPLYVAGFVNTATNTFYRFSDFTHSVPGVTTVSMTTDSSYTTLQRVAALERSGMQISRHSLSVSSYLALMEFSGNTMTRDA  
SRVLRFTVTAEALRFRQIQREFRQALSETAPVYTMTPGDVDLTNLWGRISNVLPEYRGEDGVRVGRISFNNISAILGTVAVILNC  
HHQGARSVRVNEESQPECQITGDRPVIKINNTLWESNTAAFLNRKSQFLYTTGK

taaaggagttaagc

MKKMFMAVLFALASVNAMAADCAKGKIEFSKYNEDDTFTVKVDGKEYWTSRWNLQPLLQSAQLTGMTVTIKSSTCESGSGFAE  
VQFNNDLEHHHHHH

DNA sequence sandwiched between the A and B subunit

Signal peptide

#### Stx2a-A1:

MKCILFKWVLCLLLGFSVSYSREFTIDFSTQQSYVSSLNSIRTEISTPLEHISQGTTSVSVINHTPPGSYFAVDIRGLDVYQARFDHLR  
LIIEQNPLYVAGFVNTATNTFYRFSDFTHSVPGVTTVSMTTDSSYTTLQRVAALERSGMQISRHSLSVSSYLALMEFSGNTMTRDA  
SRVLRFTVTAEALRFRQIQREFRQALSETAPVYTMTPGDVDLTNLWGRISNVLPEYRGEDGVRVGRISFNNISAILGTVAVILNC  
HHQGARSVRVNEESQPEGGSLEHHHHHH

#### Stx2a-B:

MKKMFMAVLFALASVNAMAADCAKGKIEFSKYNEDDTFTVKVDGKEYWTSRWNLQPLLQSAQLTGMTVTIKSSTCESGSGFAE  
VQFNNDHHHHHH

**Figure S1. An SDS-PAGE (4-15%) image of the purified proteins under reducing conditions and their protein sequences.**

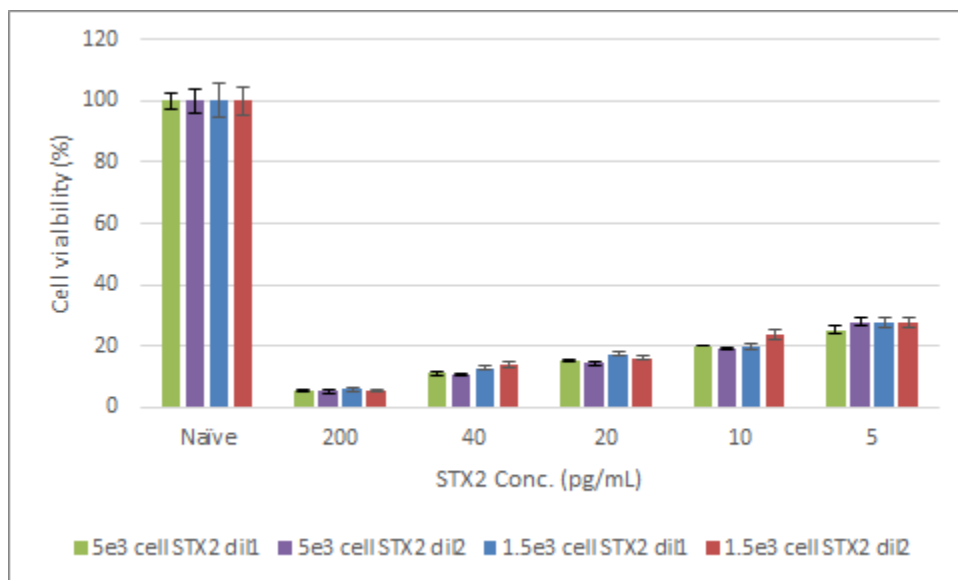

**Figure S2. Toxicity of holotoxin Stx2a.** Vero E6 cells ( $1.5 \times 10^3$  cells/well) were mixed with the appropriately diluted Stx2a and the mixture was added to 96-well plate. The cell viability was quantified 3 days later using the CellTiterGlo assay.

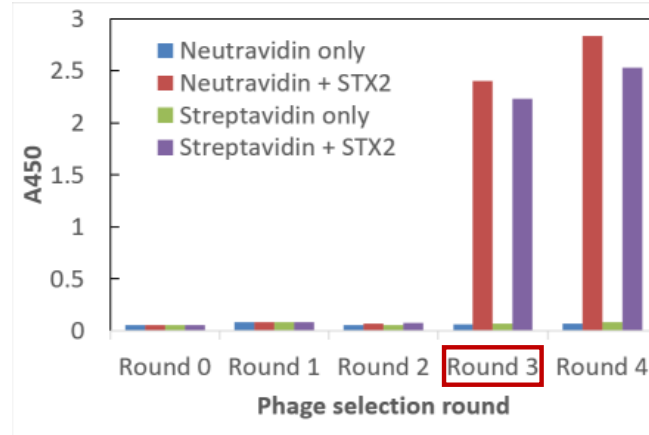

Cloned into pET28a and transformed BL21(DE3) cells

**752 clones** were picked and DARPin expressions were induced by IPTG (0.5 mM)

**48 clones** were chosen, DARPins were expressed in AI medium, and ELISA and neutralization assay were performed

**Figure S3. Enrichment of STX2-binding DARPins after phage panning.** Successive rounds of a DARPin-phage library were panned against STX2 using streptavidin-coated magnetic beads coated with 100 nM biotinylated-STX2 and MaxiSorp 96-well plates coated with neutravidin (66 nM) and 100 nM biotin-STX2 in alternative rounds. The binding of phage recovered from successive rounds of panning to STX2 was quantified using ELISA. Significant binding was observed after three rounds of panning.

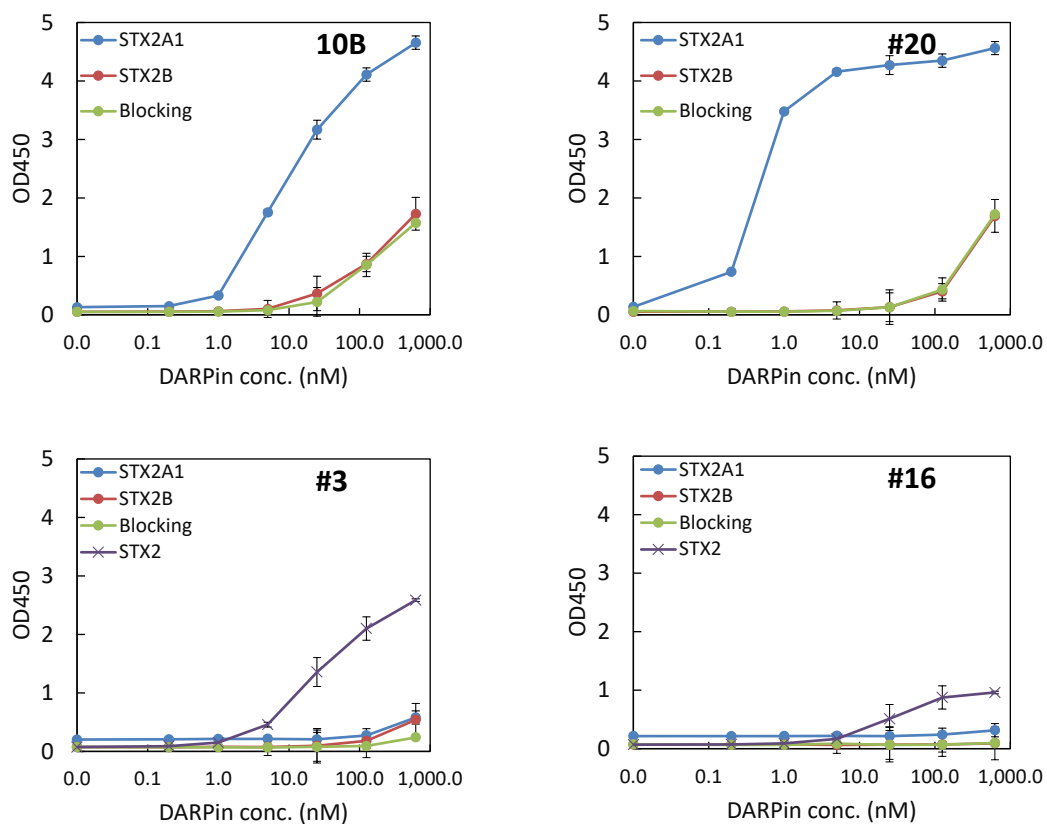

**Figure S4.** ELISA-based assay to evaluate the ability of monomeric DARPins to bind the A- and B-subunits of Stx2a. The error bars represent the mean deviation of duplicate samples from one representative experiment.

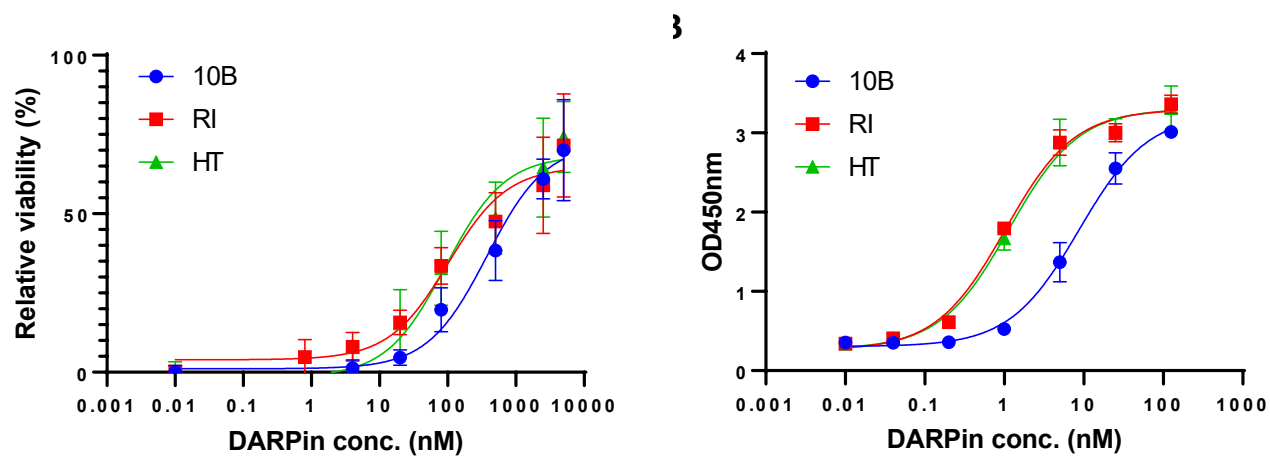

HT:

GKKLLEAARAGQDDEVRLMANGADVNA/GDPFGFTPLHLAAMFGHLEIVEVLLKNGADVNA/HDEYGF TPLHLAA VVGHL EIVEVLLKNGADVNA/CDNQGGTPLHLAAHTGHLEIVEVLLKHGADVNA/QDKFGKTAFDISIDNGNEDLA EILQ

RI:

GKKLLEAARAGQDDEVRLMANGADVNA/GDPFGFTPLHLAAMFGHLEIVEVLLKNGADVNA/HDEYGF TPLHLAA VVGHL EIVEVLLKNGADVNA/CDNQGGTPLHLAARI GHLEIVEVLLKHGADVNA/QDKFGKTAFDISIDNGNEDLA EILQ

**Figure S5.** Relative viability **(A)** and binding ability **(B)** of DARPin HT, RI and 10B. **(C)** Amino acid sequences of DARPin HT and RI. The ELISA plates were coated with the full-length Stx2a.

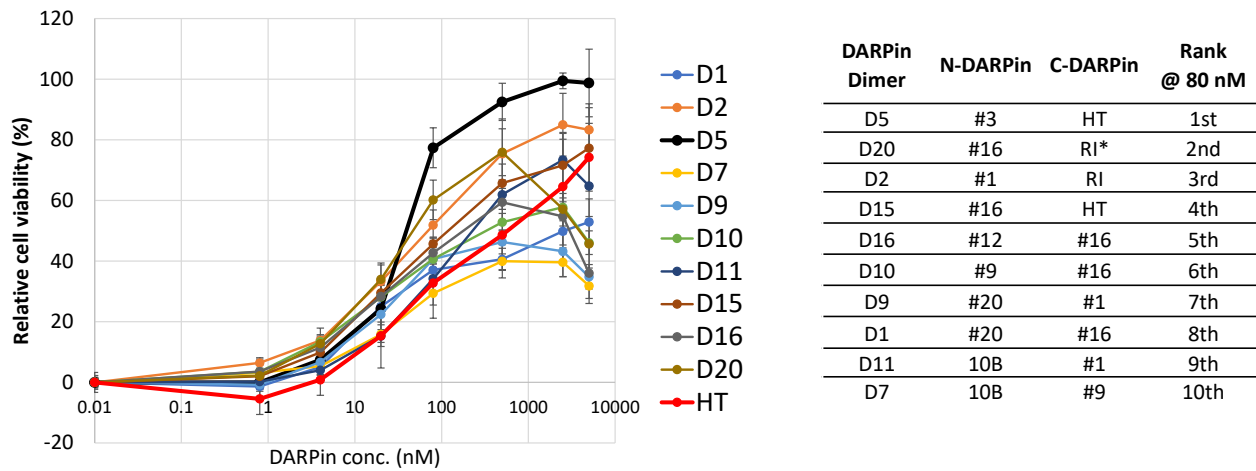

\* Variant contains additional point mutations

**Figure S6.** Activity comparison of DARPin dimers.

Figure S7. Sequence alignment of off-rate mutants.

| ID  | Motif  | NCAP                                                                                                             | AR1                                | AR2                                | AR3                                | CCAP                      |
|-----|--------|------------------------------------------------------------------------------------------------------------------|------------------------------------|------------------------------------|------------------------------------|---------------------------|
|     |        | 1-----10-----20-----30-----40-----50-----60-----70-----80-----90-----100-----110-----120-----130-----140-----150 |                                    |                                    |                                    |                           |
|     |        | GKKLLEAARAGQDDEVRI LMANGADVNA/                                                                                   | XDXXGXTPLHLAAXXGHLEIVEVLLKXGADVNA/ | XDXXGXTPLHLAAXXGHLEIVEVLLKXGADVNA/ | XDXXGXTPLHLAAXXGHLEIVEVLLKXGADVNA/ | QDKFGKTAFDISIDNGNEDLAEILQ |
|     | RI     | GKKLLEAARAGQDDEVRI LMANGADVNA/                                                                                   | GDPFGFTPLHLAAMFGHLEIVEVLLKNGADVNA/ | HDEYGFTPLHLAAVVGHLEIVEVLLKNGADVNA/ | CDNQGGTPLHLAARTGHLEIVEVLLKHGADVNA/ | QDKFGKTAFDISIDNGNEDLAEILQ |
|     | HT     | GKKLLEAARAGQDDEVRI LMANGADVNA/                                                                                   | GDPFGFTPLHLAAMFGHLEIVEVLLKNGADVNA/ | HDEYGFTPLHLAAVVGHLEIVEVLLKNGADVNA/ | CDNQGGTPLHLAARTGHLEIVEVLLKHGADVNA/ | QDKFGKTAFDISIDNGNEDLAEILQ |
| #1  | #1-A4  | -----/-----/-----E-----N-----/-----HT-----/-----I-----                                                           |                                    |                                    |                                    |                           |
| #2  | #1-A10 | ----V-----/-----/-----E-----/-----HT-----/-----                                                                  |                                    |                                    |                                    |                           |
| #3  | #2-A9  | -----/-----/-----E-----S-M-----/-----HT-----/-----                                                               |                                    |                                    |                                    |                           |
| #4  | #2-G5  | -----/-----/-----E-----/-----RM-----M-----/-----                                                                 |                                    |                                    |                                    |                           |
| #5  | #2-H7  | -----/-----/-----E-----/-----RI-----/-----                                                                       |                                    |                                    |                                    |                           |
| #6  | #2-H8  | -----V-----/-----/-----E-----R-----/-----HT-----/-----                                                           |                                    |                                    |                                    |                           |
| #7  | #3-A6  | -----V-----/-----/-----E-----R-----/-----HT-----/-----                                                           |                                    |                                    |                                    |                           |
| #8  | #3-A7  | -----/-----/-----/-----E-----/-----HT-----/-----                                                                 |                                    |                                    |                                    |                           |
| #9  | #3-A8  | -----/-----/-----/-----E-----/-----HT-----/-----                                                                 |                                    |                                    |                                    |                           |
| #10 | #3-A10 | -----/-----/-----/-----E-----L-----/-----HT-----/-----GY-----                                                    |                                    |                                    |                                    |                           |
| #11 | #3-B2  | -----V-----/-----/-----E-----/-----HT-----/-----                                                                 |                                    |                                    |                                    |                           |
| #12 | #3-C4  | -----/-----/-----LY-----/-----E-----/-----HT-----/-----                                                          |                                    |                                    |                                    |                           |
| #13 | #3-D10 | -----/-----/-----Y-----/-----E-----/-----HT-----/-----Y-----                                                     |                                    |                                    |                                    |                           |
| #14 | #3-D12 | -----V-----/-----A-----S-----/-----E-----G-----/-----RI-----/-----                                               |                                    |                                    |                                    |                           |
| #15 | #3-E9  | -----/-----/-----/-----E-----/-----HT-----/-----                                                                 |                                    |                                    |                                    |                           |
| #16 | #3-E10 | ----D---T-----/-----L-----/-----E-----/-----RI-----Q-----/-----                                                  |                                    |                                    |                                    |                           |
| #17 | #3-E11 | -----/-----/-----M-----/-----E-----G-----/S-----RI-----/-----                                                    |                                    |                                    |                                    |                           |
| #18 | #3-F8  | -----/-----/-----G-----/-----E-----/-----RI-----/-----I-----                                                     |                                    |                                    |                                    |                           |
| #19 | #3-F12 | -----/-----/-----F-----/-----E-----/-----HT-----/-----I-----                                                     |                                    |                                    |                                    |                           |
| #20 | #4-A2  | -----T-----/-----Y-----/-----E-----/-----HT-----/-----                                                           |                                    |                                    |                                    |                           |
| #21 | #4-A10 | -----/-----/-----/-----E-----/-----HT-----/-----                                                                 |                                    |                                    |                                    |                           |
| #22 | #4-B5  | -----/-----G-----/-----E-----L-----/R-----S-----HT-----R-----/-----                                              |                                    |                                    |                                    |                           |
| #23 | #4-E1  | -----/C-----/-----E-----/-----HT-----/-----                                                                      |                                    |                                    |                                    |                           |
| #24 | #4-F2  | -----/-----/-----/-----E-----N-----/-----HT-----/-----                                                           |                                    |                                    |                                    |                           |
| #25 | #4-F9  | -----/-----M-----A-----/-----E-----/-----HT-----/-----                                                           |                                    |                                    |                                    |                           |
| #26 | #4-G7  | -----/-----/-----/-----E-----/-----SHT-----/-----T-----                                                          |                                    |                                    |                                    |                           |
| #27 | #4-H5  | -----F-----/-----E-----/-----E-----/-----HT-----/-----                                                           |                                    |                                    |                                    |                           |
| #28 | #4-H7  | -----/-----Y-----/-----E-----/-----RI-----/-----                                                                 |                                    |                                    |                                    |                           |
| Syn | SHT    | -----V-----/-----LY-----/-----E-----S-M-----N-----/R-----S-----SHT-----Q-----/-----Y-----I-----                  |                                    |                                    |                                    |                           |

|          |                                                               |     |
|----------|---------------------------------------------------------------|-----|
| <b>A</b> |                                                               |     |
| Stx2a-A  | MKCILFKWVLCLLLGFSVSVYSREFTIDFSTQQSYVSSLNSIRTEISTPLEHISQGTTSV  | 60  |
| Stx2c-A  | MKCILFKWVLCLLLGFSVSVYSREFTIDFSTQQSYVSSLNSIRTEISTPLEHISQGTTSV  | 60  |
| *****    |                                                               |     |
| Stx2a-A  | SVINHTPPGSYFAVDIRGLDVYQARFDHLRLIEQNNLYVAGFVNTATNTFYRFSDFTHI   | 120 |
| Stx2c-A  | SVINHTPPGSYFAVDIRGLDVYQARFDHLRLIEQNNLYVAGFVNTATNTFYRFSDFTHI   | 120 |
| *****    |                                                               |     |
| Stx2a-A  | SVPGVTTVSMTTDSSYTTLQRVAALERSGMQISRHSVLSSYLALMEFSGNTMTRDASRAV  | 180 |
| Stx2c-A  | SVPGVTTVSMTTDSSYTTLQRVAALERSGMQISRHSVLSSYLALMEFSGNTMTRDASRAV  | 180 |
| *****    |                                                               |     |
| Stx2a-A  | LRFVTVTAEALRFRQIQREFRQALSETAPVYTMTPGDVDLTLNWGRISNVLPFYRGEDGV  | 240 |
| Stx2c-A  | LRFVTVTAEALRFRQIQREFRQALSETAPVYTMTPGDVDLTLNWGRISNVLPFYRGEDGV  | 240 |
| *****    |                                                               |     |
| Stx2a-A  | RVGRISFNNISAILGTVAVILNCHHQGARSVRVNEESQPECQITGDRPVIKINNTLWES   | 300 |
| Stx2c-A  | RVGRISFNNISAILGTVAVILNCHHQGARSVRVNEESQPECQITGDRPVIKINNTLWES   | 300 |
| *****    |                                                               |     |
| Stx2a-A  | NTAAAFNLRKSQFLYTTGK                                           | 319 |
| Stx2c-A  | NTAAAFNLRKSQFLYTTGK                                           | 319 |
| *****    |                                                               |     |
| Stx2a-B  | MKKMFMAVLFALASVNAMAADCAKKGKIEFSKYNEDDTFTVKVDGKEYWTSRWNLQPLLQS | 60  |
| Stx2c-B  | MKKMFMAVLFALVSVNAMAADCAKKGKIEFSKYNEDDTFTVKVAGKEYWTSRWNLQPLLQS | 60  |
| *****    |                                                               |     |
| Stx2a-B  | AQLTGMTVTIKSSTCESGSGFAEVQFNND                                 | 89  |
| Stx2c-B  | AQLTGMTVTIKSSTCESGSGFAEVQFNND                                 | 89  |
| *****    |                                                               |     |

**B**

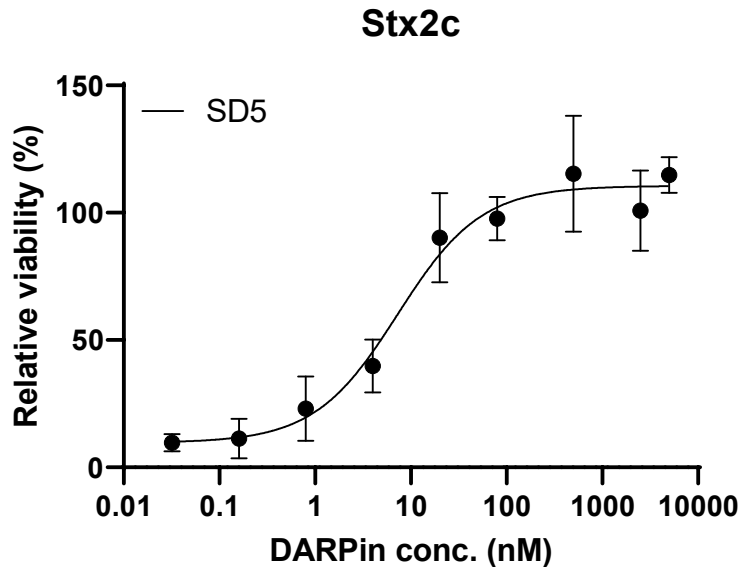

**Figure S8. (A) Sequence alignment of Stx2a and Stx2c. (B) Protection of Vero cells by SD5.** Vero E6 cells ( $1.5 \times 10^3$  cells/well) were incubated with 60 pg/mL Stx2c and the appropriately diluted DARPin for 3 days. Error bars represent the standard deviation of two independent experiments performed in duplicate.

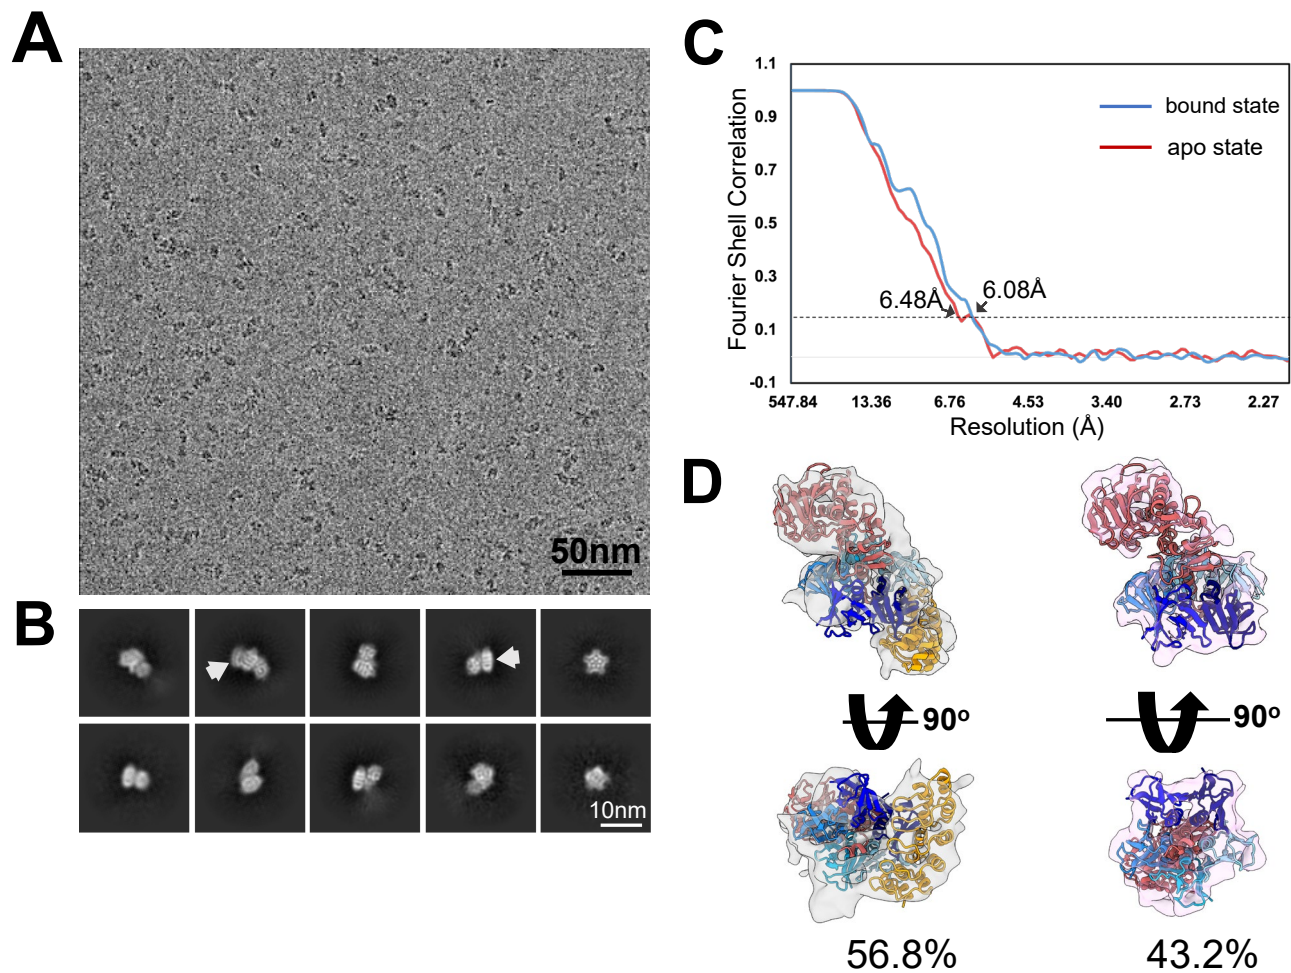

**Figure S9.** Cryo-EM analysis on Stx2a and DARPin #3 complex. **(A)** Representative micrograph of the cryo-EM data. **(B)** Representative 2D classification of the complex. The white arrows highlight the extra density of DARPin. **(C)** FSC of the bound-state map and apo-state map. **(D)** The density maps of the bound state (left) and the apo state (right) with the refined models docked in. The A subunit is colored red. The B subunit is colored blue. The DARPin is colored orange.

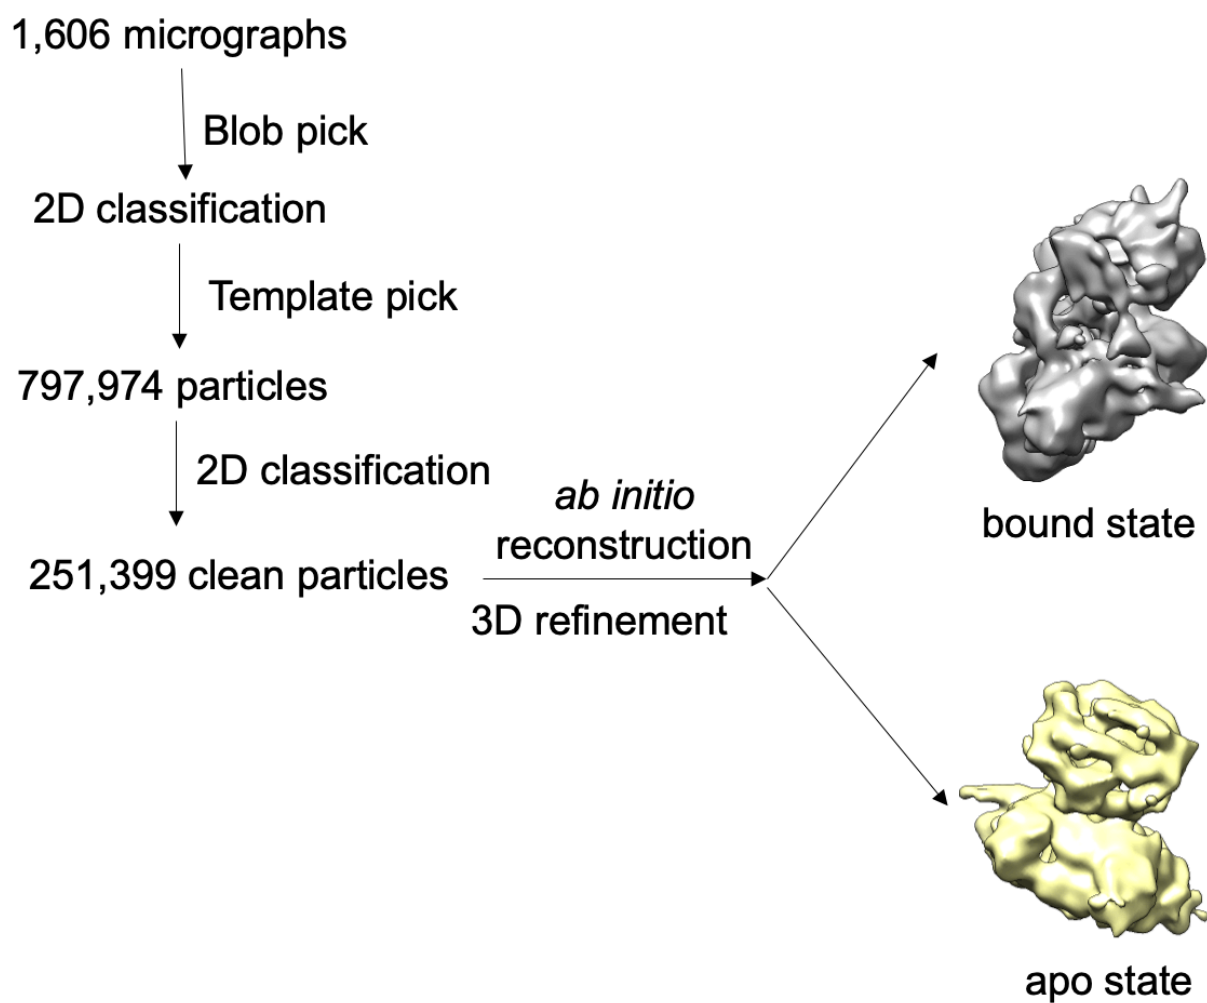

**Figure S10.** Data processing for the complex between Stx2a and DARPin #3.
